## 11 **Abstract**

12           Biological systems show diversity in terms of the underlying network structure and the governing  
13 rules of such networks. Yet, different types of biological networks may develop similar adaptation  
14 strategies in face of environmental changes. Degeneracy refers to the ability to compensate for  
15 compromised function without the need for a redundant component in the system. Highly degenerate  
16 systems show resilience to perturbations and damage because the system can compensate for  
17 compromised function due to reconfiguration of the underlying network dynamics.

18           Although formal definitions of degeneracy have been proposed, these definitions have only been  
19 tested in relatively simple networks involving weighted connections between network nodes. In this  
20 study, we test an information theoretic definition of degeneracy on random Boolean networks, frequently  
21 used to model gene regulatory networks. Random Boolean networks are discrete dynamical systems with  
22 binary connectivity and thus, these networks are well-suited for tracing information flow and the causal  
23 effects. By generating networks with random binary wiring diagrams, we test the effects of systematic  
24 lesioning of connections and perturbations of the network nodes on the degeneracy measure.

25           Our analysis shows that degeneracy, on average, is the highest in networks in which ~20% of the  
26 connections are lesioned while 50% of the nodes are perturbed. Moreover, our results for the networks  
27 with no lesions and the fully-lesioned networks are comparable to the degeneracy measures from  
28 weighted networks, thus we show that the degeneracy measure is applicable to different networks. Such a  
29 generalized applicability implies that degeneracy can be used to make predictions about the variety of  
30 systems' ability to recover function.

## 31 **Author Summary**

32           Degeneracy – the ability of structurally different elements to perform similar functions – is a  
33 property of many biological systems. Systems exhibiting a high degree of degeneracy continue to exhibit  
34 the same macroscopic behavior following a lesion even though the underlying network dynamics are

35 significantly different. Degeneracy thus suggests how biological systems can thrive despite changes to  
36 internal and external demands. Although degeneracy is a feature of network topologies and seems to be  
37 implicated in a wide variety of biological processes, research on degeneracy in biological networks is  
38 mostly limited to weighted networks (e.g., neural networks). To date, there has been no extensive  
39 investigation of information theoretic measures of degeneracy in other types of biological networks. In  
40 this paper, we apply existing approaches for quantifying degeneracy to random Boolean networks used  
41 for modeling biological gene regulatory networks. Using random Boolean networks with randomly  
42 generated rulesets to generate synthetic gene expression data sets, we systematically investigate the effect  
43 of network lesions on measures of degeneracy. Our results are comparable to measures of degeneracy  
44 using weighted networks, and this suggests that degeneracy measures may be a useful tool for  
45 investigating gene regulatory networks.

## 46 **Introduction**

47 Biological systems can adjust their functioning dynamically in face of changing circumstances.  
48 However, such functional adjustments are constrained by the structural properties of the components that  
49 perform the functions [1–7] as well as the topology of the system. Biological systems as complex  
50 networks have evolved multiple strategies to achieve a ‘working’ reconfiguration of the components that  
51 ensures survival through shifts in environmental contingencies [8–15]. One strategy is redundancy which  
52 means that a system has multiple structurally identical components serving the same function [16–19].  
53 Systems also can utilize multifunctionality (or alternatively, pluripotentiality [20,21]) that is the capacity  
54 for a single component to serve multiple functions [22–26]. Another strategy for biological systems to  
55 respond flexibly to perturbations is called degeneracy [9,10,27–29].

56 Degeneracy (or alternatively, ‘distributed redundancy’ [30], ‘distributed robustness’ [31], ‘functional  
57 redundancy’ [25], ‘extrinsic buffering’ [32]) describes the ability of components in a biological system  
58 that are structurally different to carry out the same or similar functions [20,21,21,28,33–40]. As  
59 difference in the structure implies different functions [41], under certain conditions degenerate

60 components do not necessarily show functional variety [42,43] but instead, each degenerate component is  
61 responsible for a (set of) function(s) which is initially determined by their biochemical(/physical)  
62 structure [9,21,31]. Unlike multifunctionality and redundancy, degeneracy implies a change in the role  
63 assignments among the components such that the system can continue to function even when its normal  
64 processes have been compromised.

65 A biological network with high degeneracy means that the system can show the same macroscopic  
66 behavior following a lesion even though the underlying network dynamics are significantly different. In  
67 other words, if the system is highly degenerate, after a lesion, the function can be recovered by a  
68 structurally different (i.e., performing a different function under normal conditions) component taking  
69 over a new function. For example, in the brain many different neural clusters can affect the same motor  
70 outputs, and if some of the brain areas are damaged, an alternative (non-redundant) pathway can be  
71 recruited in order to generate functionally equivalent behaviors [44–48]. Degeneracy thus suggests how  
72 biological systems can thrive despite changes to internal and external demands.

73 It has been shown that degeneracy also plays a role in complexity and evolvability of the biological  
74 systems [8,10,27,28,32,36,49]. Higher levels of degeneracy correlate with an increase in the degree of  
75 both the functional integration and local segregation of a system, and therefore, higher degeneracy is  
76 accompanied by higher degree of complexity of the systems [33]. While local segregation (namely,  
77 functional specialization) enables system to be flexible against environmental stress (due to diversity of  
78 functions), functional integration allows system to be robust [50–52]. If a component, or a group of  
79 components are compromised in a highly degenerate system, functions can be reassigned among distinct  
80 elements (that are locally segregated) while the macro-level behavior (which requires the system to be  
81 functionally integrated) is conserved. This adaptability brings an obvious advantage over the course of  
82 natural selection [44].

83 To measure degeneracy in systems, Tononi et al. [33] introduced a quantitative measure for  
84 neural networks (see also alternatives [53]) using an information theoretic approach. Information theory

85 [54–56] provides a set of tools to describe how information is processed in systems. It allows us to  
86 measure the statistical (in)dependencies in terms of the information content of the components. Mutual  
87 information (MI), which is a measure provided by information theory, can also capture nonlinear  
88 dependencies(/relationships) that are not detectable by correlation analysis [54,57]. However, direction of  
89 the interaction between the components cannot be discerned from MI alone [33,57,58]. Incorporating MI  
90 with systematic perturbations (to determine directionality), degeneracy is formalized [33] in terms of the  
91 causal effects of the changes in the state of the subsets (components and/or subgroups of components) on  
92 the system's output. If the output activity of the system is not affected by the change (e.g., perturbation)  
93 in a subset's state, then the system is highly degenerate with regard to the function that is performed by  
94 that subset. This information theoretic measure of degeneracy is, first, applied to highly abstract networks  
95 in the work by Tononi et al. [33] which is followed by applications to the weighted networks with a high  
96 degree of biological fidelity (e.g., Hodgkin-Huxley type neural networks [40] and genetic networks with  
97 epistasis [59]).

98         Although it has been shown that degeneracy as a network property exists at different levels of  
99 biological organization (from molecules to behavior [30,36,44]), a quantitative analysis of degeneracy at  
100 such levels is sparse and methods are individualized to specific cases (see the different versions of  
101 degeneracy measurements in other works [10,53,60]). In systems biology, information theoretic measures  
102 are widely applied to many problems [61], yet, to date, there is not a comprehensive study applying this  
103 measure for biologically realistic networks other than networks with weighted connections.

104         Neural networks offer one example of how biological systems can incorporate degeneracy to  
105 ensure survival after being damaged. However, other biological networks are likewise capable of  
106 recovering partial or full function following damage. For example, in between-species interaction  
107 networks a species loss can be compensated by other species contributing to ecosystem functioning [62].  
108 Likewise, on a smaller scale, it has been shown that loss of functioning in some (non-redundant) genes  
109 has a weak or no effect on the fitness of the gene networks [8]. Although degeneracy might not be

110 detectable under normal conditions, after perturbing or lesioning the biological networks, changes in the  
111 environment may also evoke degenerate responses (‘degeneracy lifting’ effect [9]). Environmental  
112 (evolutionary) pressure in receptor-signal transduction networks [53] can push the signaling pathways to  
113 reconfigure into a degenerate form.

114           Although degeneracy is a feature of biological gene networks, it is unclear whether models of  
115 gene networks can be analyzed using the same information theoretic approach as used for neural network  
116 models. A GRN is a network of gene-gene interactions through their regulators that control the gene  
117 expression levels of the products (mRNAs and proteins) which, ultimately, determine the cell fate (final  
118 cell type, i.e., function of the cell) [63]. Measurements of degeneracy at the level of gene transcription  
119 control may provide insights on how functions of genes that determine the cell function, can be recovered  
120 as a consequence of the network properties (GRN topology).

121           Random Boolean network (RBN) models, as discrete models of GRNs, are well-suited to study  
122 degeneracy since with RBNs we can induce and trace the effects of targeted lesions while  
123 environmental/external pressure is a parameter that can be controlled over in silico experiments. Unlike  
124 neuronal networks where edges are (synaptic) weight vectors, RBNs have a static wiring diagrams [64]  
125 governed by logic equations that represent the functions of gene regulatory factors (e.g., transcription  
126 factors). Logic equations describe the underlying network architecture. For example, for a simple  
127 network of 3 genes, if gene G1 is regulated both directly by G3 and through an indirect link from G2, this  
128 architecture is represented by the logic function of “G1 AND (G2 OR G3)”. Likewise, if there is an  
129 inhibitory regulation of G1 through G2 while the same architecture is preserved from the network  
130 described above, this structure can be represented by the logic equation of “G1 AND ((NOT G2) OR  
131 G3)”. Since each state of gene expression is the direct outcome of the activity of (regulatory interactions  
132 in) the previous state, one can assess the effects of circuit architecture on gene expression levels [63].  
133 Hence, in RBNs, it is feasible to trace the information flow at each (discrete) time step and so, causal  
134 influences.

135 In this study we test to what extent the information theoretic measure of degeneracy applies to RBNs.  
136 Furthermore, we test systematic lesions in randomly generated Boolean networks while varying the  
137 number of perturbed nodes. This enables us to explore how degeneracy quantitatively changes as a function  
138 of interventions to the nodes and induced topological alterations in the networks. Results show that  
139 degeneracy measures are comparable to different networks – not only to weighted networks.

## 140 **Results**

### 141 *Lesioning*

142 We first investigate the effects of systematic lesioning on measures of degeneracy in randomly  
143 wired RBNs. Edges between network nodes were lesioned in two ways. In type-1 lesioning, only  
144 outgoing edges were lesioned incrementally while it is possible (due to the pseudo-random algorithm to  
145 generate the logic functions) that incoming edges stayed intact and for all the nodes, self-connections  
146 were preserved in the network (for details see Methods). The networks with type-1 lesions decrease in  
147 average degeneracy values as the cut percentage increases (Fig1). This validates that degeneracy emerges  
148 as a network property.

149 In the second type of lesioning (hence the name type-2 lesion), we lesioned all incoming and outgoing  
150 edges (but not the self-connections) for randomly chosen genes incrementally. Similar to the type-1  
151 lesioning, average degeneracy decreases as a function of lesioning. We have anticipated that there could  
152 be a difference between the effects of lesioning types as a direct consequence of the partial lesioning (the  
153 incoming edges are preserved) in type-1 condition which can lead some nodes to become dead ends since  
154 the activity ends in those nodes. Active nodes without outgoing edges means that such nodes do not serve  
155 a function, and this eventually would result in lower degeneracy values. The comparison of two lesioning  
156 types, in Fig 1, demonstrates that both conditions have similar effect on the average degeneracy, where  
157 there is a no significant difference (two-way analysis of variance, ANOVA) found between both types of  
158 lesioning. However, average degeneracy varies with cut conditions ( $p = 0.004$ ).

159 **Fig1. Average degeneracy values compared between type-1 (green line) and type-2 (blue**  
160 **line) lesioning.** On the x axis, the cut percentage represents the affected number of nodes (in total  
161 of 10 nodes) whose edges are lesioned given the networks. For both lesioning types, degeneracy  
162 was lowest in the 100% cut condition where edges of all nodes (10) were cut.

### 163 *Perturbation*

164 Degeneracy is calculated as the area between the average  $MI^P(X^k; O)$  (mutual information, MI,  
165 between the portion of entropy shared by the system for *each* perturbed subset  $k$  and the output  $O$ ) and  
166 overall-MI (mutual information between the system and its output) for different perturbed subset sizes,  $k$   
167 (see Equation 3 in Methods). This area shows a characteristic shape of the degeneracy function: a non-  
168 zero value that declines to zero as perturbed subset size  $k$  approaches  $k = O$ , following an increase that is  
169 “higher than would be expected from a linear increase” [33]. This characteristic shape has furthermore  
170 been replicated in networks composed of in Hodgkin-Huxley neurons [40]. In our study, the analogous  
171 condition for such illustration of degeneracy is where no edges are lesioned in the networks (Fig2a).

172 In weighted networks with no connections, the average (overall-) MI shows a linear increase where  
173 degeneracy is zero [33]. Here, we have replicated this condition (i.e., 100%-of-edges-cut) in a similar way  
174 except, in our networks, nodes have preserved self-connections while all outgoing edges were lesioned.  
175 These networks also have initial variance due to the model (see details in Methods and Supporting  
176 Information) which is a system of stochastic differential equations (SDEs). Our results for no-edges-cut  
177 condition and the characteristic profile of degeneracy are comparable to corresponding findings in  
178 previous studies (Fig2 a, b).

179 **Fig 2. Degeneracy, (grey area) is computed (see Equation 3 in Methods) as the average MI**  
180 **between subsets of  $X$  and  $O$  under perturbation over increasing perturbed subset size  $k$ , in**  
181 **networks with (a, c) no lesions and with (b, d) 100%-cut condition.**



182 Further inspection of partial degeneracy (see Methods for details) values from individual  
183 simulations showed that partial degeneracy can have a negative value for some conditions (only two of  
184 such conditions captured here for comparison, Figs 3a-b). Although we have observed that partial  
185 degeneracy is negative for different cut-conditions and different sizes of perturbed subset, when MI is  
186 averaged over the simulations for all the perturbed subset sizes  $k$ ,  $\langle MI^P(X^k; O) \rangle$ , degeneracy  $D_N(X; O)$   
187 was above zero in all conditions.

188 **Fig3. Partial degeneracy values from individual networks for each perturbed subset size  $k$ .**  
189 Data from 10 ( $k$ ) x 1000 simulations of networks with (a) no-cut condition and (b) 100%- cut  
190 condition. The distribution of partial degeneracy values for (b) shows clear modes in the data  
191 where there is an overlap of the perturbed subset and output sheet.

### 192 *Interactions of lesions and perturbations*

193 Increases in both lesion extent and the number of nodes perturbed contribute to decreases in the  
194 degeneracy, raising the question of how these two factors may interact. We therefore conducted  
195 additional simulations in which each lesion condition (0%-100%, see Methods) was crossed with each  
196 perturbation condition ( $k = 1-10$ ). Fig 4 (a-b) show how average partial degeneracy changes as a function  
197 of perturbation subset size  $k$ , given cut percentages. For both lesioning types, partial degeneracy peaks  
198 around when half of the nodes ( $k \sim 5$ ) are perturbed in the system. The measure of degeneracy can detect  
199 existing isofunctionality between the different structures only when one of the structures is perturbed.  
200 When half of the nodes in the system are perturbed, we, thereby, maximize the probability of  
201 selecting/measuring the right structure for given degeneracy.

202 **Fig4. Average degeneracy computed as a function of perturbation subset size  $k$  in type-1**  
203 **lesioning (a) and type-2 lesioning (b).** Each line represents the cut condition for lesioned edges  
204 given the percentage of number of nodes in networks.

## 205 **Discussion**

206           Although a variety of types of biological networks are thought to exhibit degeneracy, previous  
207 theoretical work has primarily focused on networks with weighted connections [33,40,59]. In this study,  
208 we demonstrate that degeneracy measures are also suitable for RBNs, frequently used to model gene  
209 regulation mechanisms. Although our simulations largely replicated previous studies investigating  
210 degeneracy in neurally-inspired networks, RBNs use Boolean logic operators rather than weighted  
211 connections to determine function. It therefore might have been the case that information-theoretic  
212 approaches developed for one class of networks might not have generalized correctly to a new class. By  
213 replicating previous findings using RBNs, we demonstrate that information-theoretic approaches are  
214 applicable to a broad range of network types.

215           Network and graph theoretic approaches, frequently formulated in terms of information theory,  
216 have been applied extensively to neuroscience [50–52,58,65–74] to predict individual differences,  
217 consequences of lesions, and ability to recover function following injury. Extending this approach to the  
218 study of GRNs opens the door to investigating the consequences of, and possible remedies for, genetic  
219 dysfunction. Because most genetic functions are performed by subsets of many components within  
220 functional modules [5,75], diseases may emerge due to disorganization of the components in these  
221 modules. Degeneracy measures can be recruited for predicting and inducing topological modifications  
222 (for example, ‘rewiring of diseased modules’ [75]) to achieve desired functional outcomes that have  
223 clinical significance, such as enhanced pharmaceuticals with better drug targets.

224           In addition to replicating previous results, we explored the impact of systematically manipulating  
225 network connectivity (lesioning) while decomposing degeneracy by size of the perturbed subset. In  
226 doing so, we identify a potential interaction between the number of perturbed nodes and the magnitude of  
227 the impact of lesions on network degeneracy. In networks in which ~20% of the connections are lesioned  
228 while 50% of the nodes are perturbed, it is observed that average partial degeneracy reaches its highest  
229 value among all other cut conditions and for all perturbed subset sizes. This can be interpreted as, for

230 some conditions (here,  $k = 5$  and ~20%-cut) might allow the expression of degenerate structures without  
231 compromising their function, whereas more lesioning would diminish both primary and degenerate  
232 structures, and more perturbation would confound the functions of the nodes. Likewise, if perturbation (of  
233 the number of nodes) is smaller, not all possible degenerate structures might have expressed in the  
234 network and, also, when the lesioning is less, degenerate structures might be unobservable since most of  
235 the primary structures are intact.

236 In the literature it has been shown that additional damage (gene/node deletions) can restore the  
237 function of previously compromised (metabolic) networks [76–78]. Here, we show that, up to a point,  
238 progressively lesioning a network results in increased degeneracy. This finding suggests that it might be  
239 possible to determine an optimum degree of lesioning and perturbation given a network to achieve higher  
240 degeneracy in the systems. Thus, partial degeneracy measures might be helpful to develop strategies to  
241 predict how to recover the function after damage.

242 As originally conceived, degeneracy was intended to capture the idea that identical functions  
243 could be carried out by distinct network structures. Intuitively, therefore, degeneracy would seem to have  
244 a lower bound at zero – in a network with no degeneracy, all structures would serve their own individual  
245 functions, and perturbation of those structures would disrupt network output related to the function  
246 served. Although on average degeneracy in our simulations tended to be above or equal to zero, we  
247 observed individual simulations in which partial degeneracy values were below zero. In previous studies  
248 ([40,59]), negative degeneracy has been observed especially for network models with increased biological  
249 fidelity.

250 One possible reason for the observation of negative degeneracy may be that the information-  
251 theoretic measure for degeneracy was originally developed for and tested on neural networks with no  
252 initial variance. As the biological fidelity of the models (thus, inherent variance in the systems) increases,  
253 for some conditions (lower coupling and lower connection probability [40] and networks with lower  
254 complexity [59]) negative degeneracy has been shown. However, we have not observed such effects on

255 overall degeneracy measurements where 1000 MI values for each possible subset size  $k$  were averaged  
256 across random networks. Mathematically, degeneracy gets a negative value when the portion ( $k/n$ ) of the  
257 MI between the whole system ( $n$ ) and the output sheet ( $n/2$ ) is higher than the average of the MI between  
258 the (perturbed) subset of the system ( $k$ ) and the output sheet ( $n/2$ ). However, the biological  
259 meaning/equivalence of negative degeneracy remains unclear. For studying more biologically realistic  
260 complex networks, adjustments in the tools for quantifying degeneracy may be needed.

## 261 **Methods**

### 262 **Network Architecture**

263 RBNs were initially proposed as simplified models for gene regulatory networks by Kauffmann  
264 [79] where network nodes represent the genes, and the edges represent the regulatory functions. A RBN  
265 constitutes a discrete dynamical system that has  $N$  nodes with  $K$  incoming edges (hence, also referred to  
266 as  $N$ - $K$  models). Each node (gene) can be ON or OFF (1 or 0); a network of  $N$  binary nodes therefore has  
267  $2^N$  distinct states [79]. This system is state determined [79] according to Boolean functions that are  
268 assigned to each node randomly (from  $K^N$  possible states) where each node has a minimum of zero to a  
269 maximum of  $N$  inputs [80]. Such a state-space allows random network configurations which often leads  
270 to nonlinear dynamics. In this study, the nodes can have no inputs (but the self-connection) without an  
271 upper boundary, so that a gene can have a maximum of  $N$  inputs. The total number of nodes representing  
272 the genes, here, is  $N = 10$ , thus there are  $2^{10}$  possible states. In RBNs, the state of the nodes in the network  
273 can be updated synchronously or asynchronously in discrete time steps. In this study, for simplicity  
274 purposes, a synchronous update rule is chosen.

275 RBNs have a well-defined function mapping scheme through logic (Boolean) operators which  
276 constitute the rules for connections that control the state of gene regulators. In our setting, operators *AND*,  
277 *NOT*, *OR* are randomly placed to generate rulesets (functions). If a node has only one input (that is one  
278 gene is connected to another gene) the probability of the function to have *NOT* operator is 0.5. If a node

279 has two genes assigned to it (outgoing edges), the probability of these two genes to be connected to the  
280 node via *OR* operator or *AND NOT* operator is both 0.5. Outgoing edges are randomly distributed for each  
281 node with the condition that each node has at least one (thereby, connectivity is preserved) and at most  
282 two (more than one Boolean operator) edges mapped to the other nodes, while all the nodes have self-  
283 connections Thus, incoming edges are assigned to the nodes in a completely random fashion (allowing for  
284 the emergence of network hubs).

## 285 **Network Lesioning**

286 Degeneracy, as a strategy (or design principle [10,21,81]) for networks to recover their function,  
287 refers to the rearrangement of (structurally different) components in a way that function/output remains  
288 the same even after a damage. In a network with high degeneracy, there are many possible network  
289 reconfigurations that can produce/recover the function. To test the potential factors that give rise to  
290 (higher/lower) degeneracy in networks, here, we induce interventions to the systems at the network-level  
291 by lesioning the edges.

292 Two different lesions were introduced to the synthetic networks. In type-1 lesioning, all outgoing  
293 edges from randomly chosen nodes were cut while the self-connections of the nodes and incoming edges  
294 were preserved. In the second type of lesioning, all incoming and outgoing edges were cut (except for  
295 self-connections) from randomly selected nodes given the percentage of total lesioned edges. In both  
296 types of lesioning, the edges are lesioned in increments of ten percent of the total number of the nodes  
297 given a network. For example, in type-1 30% cut condition, we have lesioned all the outgoing edges  
298 (except the self-connections) of the 3 randomly chosen nodes given a network of 10 nodes. Likewise, in  
299 type-2 30% cut condition, all the edges (incoming and outgoing, except the self-connections) of 3  
300 randomly chosen nodes (out of 10 nodes total in a network) were lesioned. By 100%-cut condition (in  
301 both lesioning types), we refer to networks where no node is connected to the other, and the nodes have  
302 only self-connections.

303 For both lesioning types, 0%-cut condition refers to networks that are not lesioned, yet the edges  
304 are randomly disturbed (according to the method that is defined previously). This may lead some nodes to  
305 not have any edges (but the self-connection) due to random assignments of the rules, therefore,  
306 mimicking a (partially) lesioned condition.

## 307 **Biologically realistic random Boolean networks: Discrete to Continuous**

308 Boolean functions describe how the states of the regulators control the state of the target genes  
309 [82]. In our study, Boolean functions are randomly generated for each simulation with incremental  
310 lesioning. To execute numerical simulations, we used the BoolODE pipeline by Pratapa et al. [82].  
311 BoolODE systematically converts a random Boolean network into a system of SDEs that is a continuous  
312 model of gene regulation (for model specifications see SI Text 1 and SI Table). Time points in the  
313 numerical solution result in vectors of gene expression values that correspond to individual cells. That  
314 means for every analysis, each sampled time point is from a cell [82], and in this study, we sample from  
315 990 time points (1000-10, first 10 timepoints treated as burn-in) for each gene in a single simulation and  
316 total of 1000 simulations are run for each lesioning percentage increment of 10s (from no cut condition to  
317 all 10 genes cut) which makes 10000 simulations for each type of lesioning and thus, 2 (lesioning type) x  
318 10 (k subset of perturbed genes) x 11 (cut conditions, no-cut condition inclusive) x 10 synthetic cells with  
319 random gene regulatory mechanisms.

## 320 **Quantification of degeneracy in neural networks**

321 To measure degeneracy, we used the mathematical framework described by Tononi et al. [33]. In  
322 this framework, degeneracy is characterized in terms of the average mutual information between subsets  
323 of elements within a system and an output sheet (which is also a subset of network  $X$ ). The output sheet  
324 is a set of randomly chosen nodes in a network and its activity is a result of the interactions the other  
325 nodes in the system. Thus, activity in the output sheet represents the behavior or the response of the whole  
326 system.

327 From information theory, entropy (Shannon entropy with log base 2 for binary representation) is  
328 calculated from probability density functions for subsets of  $X$  (Equation 1). Then mutual information that  
329 measures the portion of entropy shared by the system subset  $X_j^k$  and the output  $O$ , is calculated as follows  
330 (*Equation 2*):

$$331 \quad H(X) = - \sum_{i=1}^n P(x_i) \log_2 P(x_i)$$

332 (1)

$$333 \quad MI(X_j^k; O) = H(X_j^k) + H(O) - H(X_j^k, O)$$

334 (2)

336  $H(X_j^k)$  and  $H(O)$  are the entropies of  $X_j^k$  and  $O$  considered independently, whereas  $H(X_j^k; O)$  is the  
337 joint entropy of subset  $X_j^k$  and output  $O$ . To measure degeneracy in the network, we need to determine the  
338 effects of the (subset of) element(s) on the entropy of the output - the behavior of the network. Since  
339 mutual information does not capture direction, however, mere calculation of mutual information is not  
340 enough to determine the contribution of the elements to the output of the system. To overcome this,  
341 perturbations (variance) are injected to the system. If no initial variance is assumed in the system, the  
342 value of mutual information between the network and the output is zero before any perturbation [33].  
343 Variance (perturbation) is injected as uncorrelated random noise to each subset  $k$ .

344 Under such perturbations, mutual information of the system is computed as in *EQ3* and this  
345 procedure is repeated for all subsets of sizes  $1 \leq k \leq n$ . Then, degeneracy  $D_N(X; O)$  of  $X$  with respect to  $O$   
346 can be calculated as:

$$347 \quad D_N(X; O) = \sum_{k=1}^n [ \langle MI^P(X_j^k; O) \rangle - \left(\frac{k}{n}\right) MI^P(X; O) ]$$

348 (3)

349  $MI^P(X;O)$  is MI for all elements to the output sheet, and  $\langle MI^P(X_j^k;O) \rangle$  is the average of the contribution  
350 of each perturbed subset size  $k$  to the output sheet.

### 351 **Quantification of degeneracy in random Boolean networks**

352 Biological RBN simulations (via BoolODE) results in continuous unit activity in terms of gene  
353 expression vectors since the simulated networks are translated into nonlinear dynamical system (SI Text 1  
354 and 2, SI Figure). To quantify degeneracy in RBNs we therefore discretize the gene expression vectors by  
355 taking the median activity for a unit. Activity that is above the median is set to 1, and activity below the  
356 median is set to 0.

357 We apply the degeneracy measures to the discretized gene expression vectors generated from the  
358 simulations. In our simulations, perturbations are systematically injected to the subset size  $k$  of genes as  
359 normally distributed (with *mean* = 0, and *standard deviation* = 0.01) random noise through the governing  
360 SDE. The number of elements (namely, the genes) is  $n = 10$  for all simulations with output sheet  
361 consisted of the activity of  $O = n/2 = 5$  elements, that is also randomized for each trial.

362 **Fig5. Illustration of RBNs under perturbation. A network of X, composed of nodes (light and**  
363 **dark blue circles, n = 10) that are interconnected.** Arrows represent the edges for incoming,  
364 outgoing, and self-connections. Light blue circles represent randomly chosen perturbation subsets of  
365 nodes for  $k = 2$  (a) and  $k = 7$  (b). Perturbation (represented as syringes) of the nodes in boxes with  $k$   
366 notation, is injected as a variance (uncorrelated noise). The box with O notation represents output  
367 sheet that is also consisted of randomly chosen set of ( $n/2 = 5$ ) nodes (dark blue circles). For each  
368 network, MI is calculated for perturbed set size  $k$  and the output sheet O, for all subset sizes of  
369 perturbed set noted as  $j$ .



## 370 **Partial degeneracy in random networks**

371 Degeneracy can be measured by alternate ways that are mathematically equivalent (see other  
372 definitions in [33]). The formal definition that we use in this study requires averaging over every MI  
373 measured between each node (unit,  $j$ ) which are incrementally perturbed (from  $k = 1$  to  $k = n$ ) and the  
374 output sheet for a given network structure ( $\langle MI^P(X_j^k; O) \rangle$ ). However, in case where all the networks are  
375 randomly generated and the output sheet units are randomly chosen, an alternate way of computing  
376  $\langle MI^P(X_j^k; O) \rangle$  is taking the average of MI measured for each random network that is perturbed once for a  
377 particular perturbed subset size  $k$  in range of  $1 \leq k \leq n$ . This way, degeneracy is measured for a specific  
378 subset given a network rather than for all possible subset sizes. Here, we call this measurement *partial*  
379 *degeneracy*.

## 380 **Supporting information**

381 **S1 Text 1. Simulation platform.**

382 **S1 Text 2. Model specifications.**

383 **S1 Figure. A toy network with Boolean functions and translation into SDE.**

## 384 **References**

1. Forman-Kay JD, Mittag T. From Sequence and Forces to Structure, Function, and Evolution of Intrinsically Disordered Proteins. *Structure*. 2013 Sep 3;21(9):1492–9.
2. Sadowski MI, Jones DT. The sequence–structure relationship and protein function prediction. *Curr Opin Struct Biol*. 2009 Jun 1;19(3):357–62.
3. Pal D, Eisenberg D. Inference of Protein Function from Protein Structure. *Structure*. 2005 Jan 1;13(1):121–30.

4. Hvidsten TR, Læg Reid A, Kryshatfovych A, Andersson G, Fidelis K, Komorowski J. A Comprehensive Analysis of the Structure-Function Relationship in Proteins Based on Local Structure Similarity. *PLOS ONE*. 2009 Jul 15;4(7):e6266.
5. Hartwell LH, Hopfield JJ, Leibler S, Murray AW. From molecular to modular cell biology. *Nature*. 1999 Dec;402(6761):C47–52.
6. Buzsáki G. *Rhythms of the Brain*. Oxford University Press; 2006.
7. Biology NRC (US) C on RO in. *Molecular Structure and Function. Opportunities in Biology*. National Academies Press (US); 1989.
8. Wagner A. Robustness against mutations in genetic networks of yeast. *Nat Genet*. 2000 Apr;24(4):355–61.
9. Subramaniam AR, Pan T, Cluzel P. Environmental perturbations lift the degeneracy of the genetic code to regulate protein levels in bacteria. *Proc Natl Acad Sci*. 2013 Feb 5;110(6):2419–24.
10. Whitacre J, Bender A. Degeneracy: A design principle for achieving robustness and evolvability. *J Theor Biol*. 2010 Mar 7;263(1):143–53.
11. Yamada T, Bork P. Evolution of biomolecular networks — lessons from metabolic and protein interactions. *Nat Rev Mol Cell Biol*. 2009 Nov;10(11):791–803.
12. Helsen J, Frickel J, Jelier R, Verstrepen KJ. Network hubs affect evolvability. *PLOS Biol*. 2019 Jan 30;17(1):e3000111.
13. Hintze A, Adami C. Evolution of Complex Modular Biological Networks. *PLoS Comput Biol*. 2008 Feb;4(2).

14. Romanuk TN, Vogt RJ, Young A, Tuck C, Carscallen MW. Maintenance of Positive Diversity-Stability Relations along a Gradient of Environmental Stress. *PLoS ONE*. 2010 Apr 27;5(4).
15. Wagner A, Wright J. Alternative routes and mutational robustness in complex regulatory networks. *Biosystems*. 2007 Mar 1;88(1):163–72.
16. Gu X. Evolution of duplicate genes versus genetic robustness against null mutations. *Trends Genet*. 2003 Jul 1;19(7):354–6.
17. Gu Z, Steinmetz LM, Gu X, Scharfe C, Davis RW, Li W-H. Role of duplicate genes in genetic robustness against null mutations. *Nature*. 2003 Jan;421(6918):63–6.
18. Nowak MA, Boerlijst MC, Cooke J, Smith JM. Evolution of genetic redundancy. *Nature*. 1997 Jul 10;388(6638):167–71.
19. Schneidman E, Bialek W, Berry MJ. Synergy, redundancy, and independence in population codes. *J Neurosci Off J Soc Neurosci*. 2003 Dec 17;23(37):11539–53.
20. Noppeney U, Friston KJ, Price CJ. Degenerate neuronal systems sustaining cognitive functions. *J Anat*. 2004;205(6):433–42.
21. Maleszka R, Mason PH, Barron AB. Epigenomics and the concept of degeneracy in biological systems. *Brief Funct Genomics*. 2014 May 1;13(3):191–202.
22. Kelso JAS. Multistability and metastability: understanding dynamic coordination in the brain. *Philos Trans R Soc B Biol Sci*. 2012 Apr 5;367(1591):906–18.
23. Farina SC, Kane EA, Hernandez LP. Multifunctional Structures and Multistructural Functions: Integration in the Evolution of Biomechanical Systems. *Integr Comp Biol*. 2019 Aug 1;59(2):338–45.

24. Salathé M, Ackermann M, Bonhoeffer S. The Effect of Multifunctionality on the Rate of Evolution in Yeast. *Mol Biol Evol.* 2006 Apr 1;23(4):721–2.
25. Gamfeldt L, Hillebrand H, Jonsson PR. Multiple Functions Increase the Importance of Biodiversity for Overall Ecosystem Functioning. *Ecology.* 2008;89(5):1223–31.
26. Hector A, Bagchi R. Biodiversity and ecosystem multifunctionality. *Nature.* 2007 Jul 12;448(7150):188–90.
27. Atamas N, Atamas MS, Atamas F, Atamas SP. Non-local competition drives both rapid divergence and prolonged stasis in a model of speciation in populations with degenerate resource consumption. *Theor Biol Med Model.* 2012 Dec 27;9(1):56.
28. Atamas SP, Bell J. Degeneracy-driven self-structuring dynamics in selective repertoires. *Bull Math Biol.* 2009 Aug;71(6):1349–65.
29. Prinz AA, Bucher D, Marder E. Similar network activity from disparate circuit parameters. *Nat Neurosci.* 2004 Dec;7(12):1345–52.
30. Randles M, Lamb D, Odat E, Taleb-Bendiab A. Distributed redundancy and robustness in complex systems. *J Comput Syst Sci.* 2011 Mar 1;77(2):293–304.
31. Wagner A. Distributed robustness versus redundancy as causes of mutational robustness. *BioEssays.* 2005;27(2):176–88.
32. Hartman JL, Garvik B, Hartwell L. Principles for the Buffering of Genetic Variation. *Science.* 2001 Feb 9;291(5506):1001–4.
33. Tononi G, Sporns O, Edelman GM. Measures of degeneracy and redundancy in biological networks. *Proc Natl Acad Sci.* 1999 Mar 16;96(6):3257–62.

34. Leonardo A. Degenerate coding in neural systems. *J Comp Physiol A*. 2005 Nov 1;191(11):995–1010.
35. Reichmann ME, Rees MW, Symons RH, Markham R. Experimental evidence for the degeneracy of the nucleotide triplet code. *Nature*. 1962 Sep 8;195:999–1000.
36. Mason PH. Degeneracy at Multiple Levels of Complexity. *Biol Theory*. 2010 Sep 1;5(3):277–88.
37. Beverly M, Anbil S, Sengupta P. Degeneracy and Neuromodulation among Thermosensory Neurons Contribute to Robust Thermosensory Behaviors in *Caenorhabditis elegans*. *J Neurosci*. 2011 Aug 10;31(32):11718–27.
38. Calis JJA, Boer RJ de, Keşmir C. Degenerate T-cell Recognition of Peptides on MHC Molecules Creates Large Holes in the T-cell Repertoire. *PLOS Comput Biol*. 2012 Mar 1;8(3):e1002412.
39. Price CJ, Friston KJ. Degeneracy and cognitive anatomy. *Trends Cogn Sci*. 2002 Oct 1;6(10):416–21.
40. Man M, Zhang Y, Ma G, Friston K, Liu S. Quantification of degeneracy in Hodgkin–Huxley neurons on Newman–Watts small world network. *J Theor Biol*. 2016 Aug 7;402:62–74.
41. Burley SK, Almo SC, Bonanno JB, Capel M, Chance MR, Gaasterland T, et al. Structural genomics: beyond the human genome project. *Nat Genet*. 1999 Oct;23(2):151–7.
42. Boeckmann B, Blatter M-C, Famiglietti L, Hinz U, Lane L, Roechert B, et al. Protein variety and functional diversity: Swiss-Prot annotation in its biological context. *C R Biol*. 2005 Oct 1;328(10):882–99.
43. Petchey OL, Gaston KJ. Functional diversity: back to basics and looking forward. *Ecol Lett*. 2006 Jun;9(6):741–58.

44. Edelman GM, Gally JA. Degeneracy and complexity in biological systems. *Proc Natl Acad Sci*. 2001 Nov 20;98(24):13763–8.
45. Fetz EE. Are movement parameters recognizably coded in the activity of single neurons? *Behav Brain Sci*. 1992 Dec;15(4):679–90.
46. Fitch HL, Kupin JJ, Kessler IJ, DeLucia J. Relating articulation and acoustics through a sinusoidal description of vocal tract shape. *Speech Commun*. 2003 Feb 1;39(3):243–68.
47. Todorov E. Optimality principles in sensorimotor control. *Nat Neurosci*. 2004 Sep;7(9):907–15.
48. Lee RG, Donkelaar P van. Mechanisms Underlying Functional Recovery Following Stroke. *Can J Neurol Sci*. 1995 Nov;22(4):257–63.
49. Whitacre JM. Degeneracy: a link between evolvability, robustness and complexity in biological systems. *Theor Biol Med Model*. 2010 Feb 18;7(1):6.
50. Sporns O. Structure and function of complex brain networks. *Dialogues Clin Neurosci*. 2013 Sep;15(3):247–62.
51. Sporns O. Network attributes for segregation and integration in the human brain. *Curr Opin Neurobiol*. 2013 Apr 1;23(2):162–71.
52. Tononi G. Functional segregation and integration in the nervous system: Theory and models. In: Franzén O, Johansson R, Terenius L, editors. *Somesthesia and the Neurobiology of the Somatosensory Cortex*. Basel: Birkhäuser; 1996. p. 409–18. (Advances in Life Sciences).
53. Li Y, Dwivedi G, Huang W, Kemp ML, Yi Y. Quantification of degeneracy in biological systems for characterization of functional interactions between modules. *J Theor Biol*. 2012 Jun 7;302:29–38.

54. Shannon CE. A mathematical theory of communication. *Bell Syst Tech J.* 1948 Jul;27(3):379–423.
55. MacKay DJC. *Information Theory, Inference & Learning Algorithms.* USA: Cambridge University Press; 2002.
56. Mézard M, Montanari A. *Information, Physics, and Computation.* Information, Physics, and Computation. Oxford University Press; 2009.
57. Burge C, Gifford D, Fraenkel E. *Foundations of Computational and Systems Biology [Internet].* Massachusetts Institute of Technology: MIT OpenCourseWare, <https://ocw.mit.edu/>. 2014. Available from: [https://ocw.mit.edu/courses/biology/7-91j-foundations-of-computational-and-systems-biology-spring-2014/lecture-slides/MIT7\\_91JS14\\_Lecture15.pdf](https://ocw.mit.edu/courses/biology/7-91j-foundations-of-computational-and-systems-biology-spring-2014/lecture-slides/MIT7_91JS14_Lecture15.pdf)
58. Quinn CJ, Coleman TP, Kiyavash N, Hatsopoulos NG. Estimating the directed information to infer causal relationships in ensemble neural spike train recordings. *J Comput Neurosci.* 2011 Feb 1;30(1):17–44.
59. Macía J, Solé RV, Elena SF. The Causes of Epistasis in Genetic Networks. *Evolution.* 2012;66(2):586–96.
60. Kang S, Ma W, Li FY, Zhang Q, Niu J, Ding Y, et al. Functional Redundancy Instead of Species Redundancy Determines Community Stability in a Typical Steppe of Inner Mongolia. *PLOS ONE.* 2015 Dec 23;10(12):e0145605.
61. Scherrer K, Jost J. The gene and the genon concept: a functional and information-theoretic analysis. *Mol Syst Biol.* 2007 Jan 1;3(1):87.
62. Fetzer I, Johst K, Schäwe R, Banitz T, Harms H, Chatzinotas A. The extent of functional redundancy changes as species' roles shift in different environments. *Proc Natl Acad Sci.* 2015 Dec 1;112(48):14888–93.

63. Peter IS. Methods for the experimental and computational analysis of gene regulatory networks in sea urchins. *Methods Cell Biol.* 2019;151:89–113.
64. Gershenson C. In Bedau, M., P. Husbands, T. Hutton, S. Kumar, and H. Suzuki (eds.) *Workshop and Tutorial Proceedings*. In 2004. p. 160–73.
65. Zalesky A, Fornito A, Bullmore ET. Network-based statistic: Identifying differences in brain networks. *NeuroImage.* 2010 Dec 1;53(4):1197–207.
66. Chai LR, Khambhati AN, Ciric R, Moore TM, Gur RC, Gur RE, et al. Evolution of brain network dynamics in neurodevelopment. *Netw Neurosci.* 2017 Jan 6;1(1):14–30.
67. De Domenico M, Sasai S, Arenas A. Mapping Multiplex Hubs in Human Functional Brain Networks. *Front Neurosci.* 2016;10.
68. Fornito A, Zalesky A, Breakspear M. Graph analysis of the human connectome: Promise, progress, and pitfalls. *NeuroImage.* 2013 Oct 15;80:426–44.
69. Bullmore E, Sporns O. Complex brain networks: graph theoretical analysis of structural and functional systems. *Nat Rev Neurosci.* 2009 Mar;10(3):186–98.
70. Medaglia JD, Lynall M-E, Bassett DS. Cognitive Network Neuroscience. *J Cogn Neurosci.* 2015 Mar 24;27(8):1471–91.
71. Salvador R, Anguera M, Gomar JJ, Bullmore ET, Pomarol-Clotet E. Conditional Mutual Information Maps as Descriptors of Net Connectivity Levels in the Brain. *Front Neuroinformatics.* 2010;4.



72. Salvador R, Martínez A, Pomarol-Clotet E, Sarró S, Suckling J, Bullmore E. Frequency based mutual information measures between clusters of brain regions in functional magnetic resonance imaging. *NeuroImage*. 2007 Mar 1;35(1):83–8.
73. Bassett DS, Bullmore ET, Meyer-Lindenberg A, Apud JA, Weinberger DR, Coppola R. Cognitive fitness of cost-efficient brain functional networks. *Proc Natl Acad Sci*. 2009 Jul 14;106(28):11747–52.
74. Moddemeijer R. On estimation of entropy and mutual information of continuous distributions. *Signal Process*. 1989 Mar 1;16(3):233–48.
75. Barabási A-L, Oltvai ZN. Network biology: understanding the cell’s functional organization. *Nat Rev Genet*. 2004 Feb;5(2):101–13.
76. Motter AE, Gulbahce N, Almaas E, Barabási A-L. Predicting synthetic rescues in metabolic networks. *Mol Syst Biol*. 2008 Jan 1;4(1):168.
77. Causey TB, Zhou S, Shanmugam KT, Ingram LO. Engineering the metabolism of *Escherichia coli* W3110 for the conversion of sugar to redox-neutral and oxidized products: Homoacetate production. *Proc Natl Acad Sci*. 2003 Feb 4;100(3):825–32.
78. Trinh CT, Carlson R, Wlaschin A, Srieenc F. Design, construction and performance of the most efficient biomass producing *E. coli* bacterium. *Metab Eng*. 2006 Nov 1;8(6):628–38.
79. Kauffman SA. Metabolic stability and epigenesis in randomly constructed genetic nets. *J Theor Biol*. 1969 Mar 1;22(3):437–67.
80. Rubinacci S, Graudenzi A, Caravagna G, Mauri G, Osborne J, Pitt-Francis J, et al. CoGNAC: A Chaste Plugin for the Multiscale Simulation of Gene Regulatory Networks Driving the Spatial Dynamics of Tissues and Cancer. *Cancer Inform*. 2015;14(Suppl 4):53–65.

81. Krichmar JL. Design principles for biologically inspired cognitive robotics. *Biol Inspired Cogn Archit*. 2012 Jul 1;1:73–81.
82. Pratapa A, Jalihal AP, Law JN, Bharadwaj A, Murali TM. Benchmarking algorithms for gene regulatory network inference from single-cell transcriptomic data. *Nat Methods*. 2020 Feb;17(2):147–54.

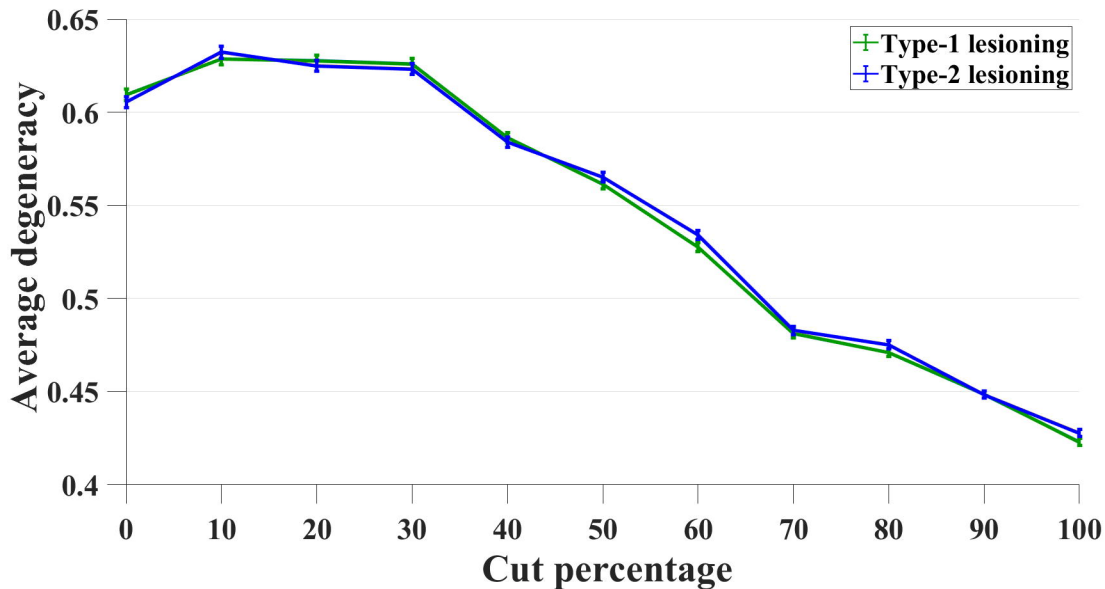

(a) no-cut condition

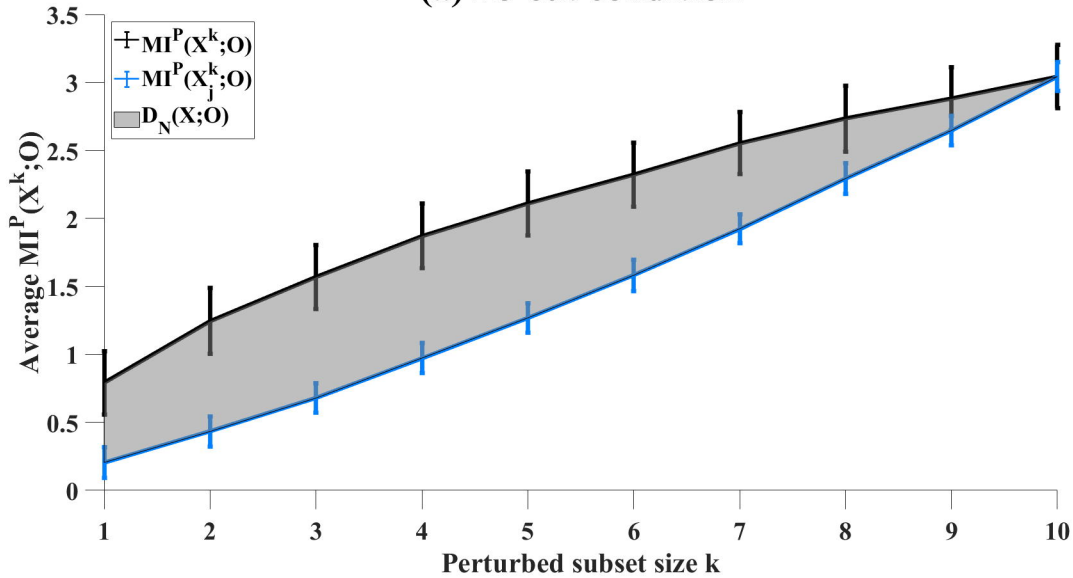

(b) 100%-cut condition

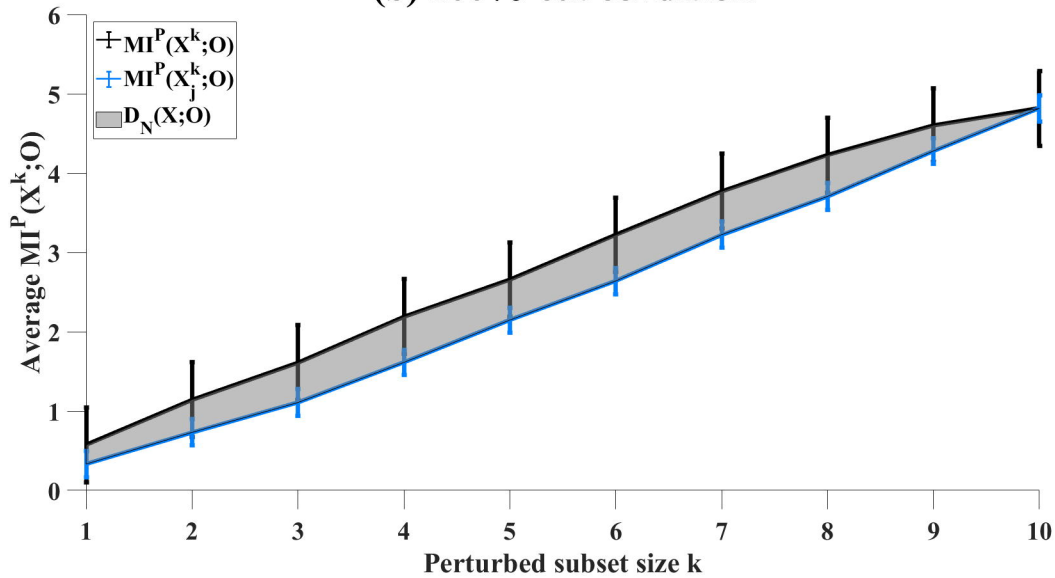

**(c) no-cut condition**

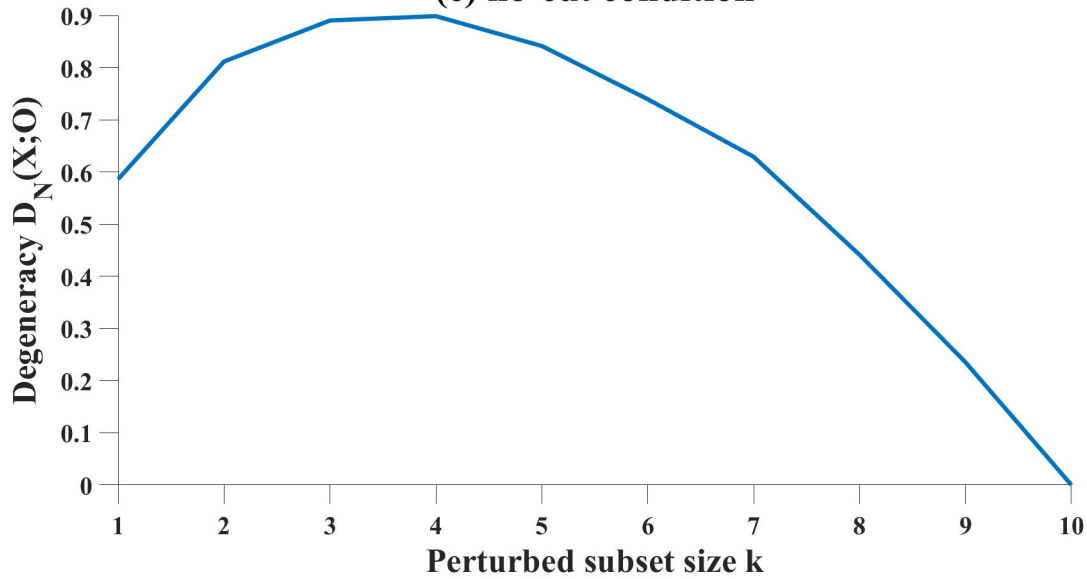

**(d) 100%-cut condition**

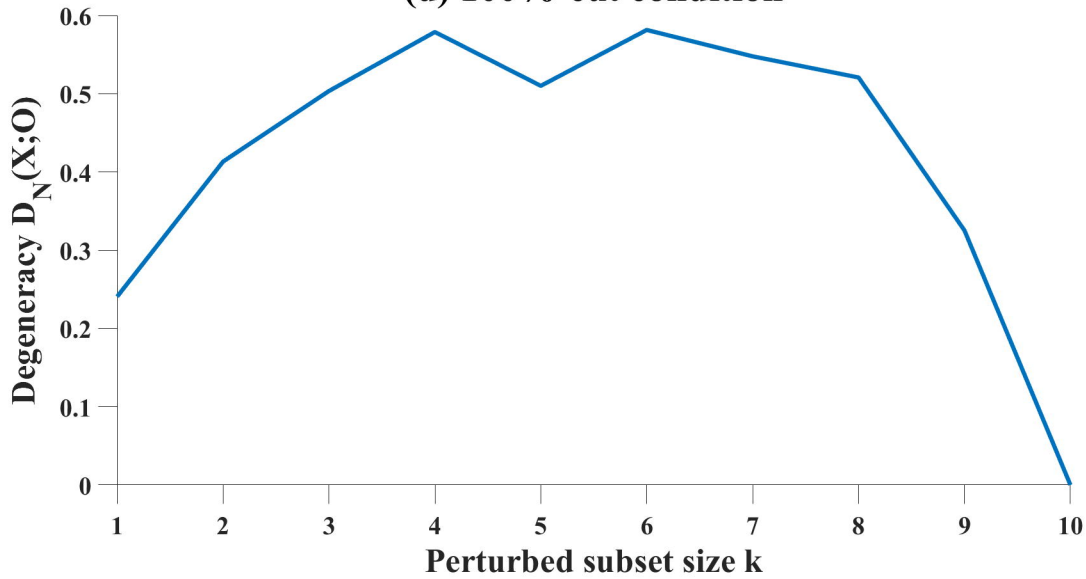

**(a) no-cut condition**

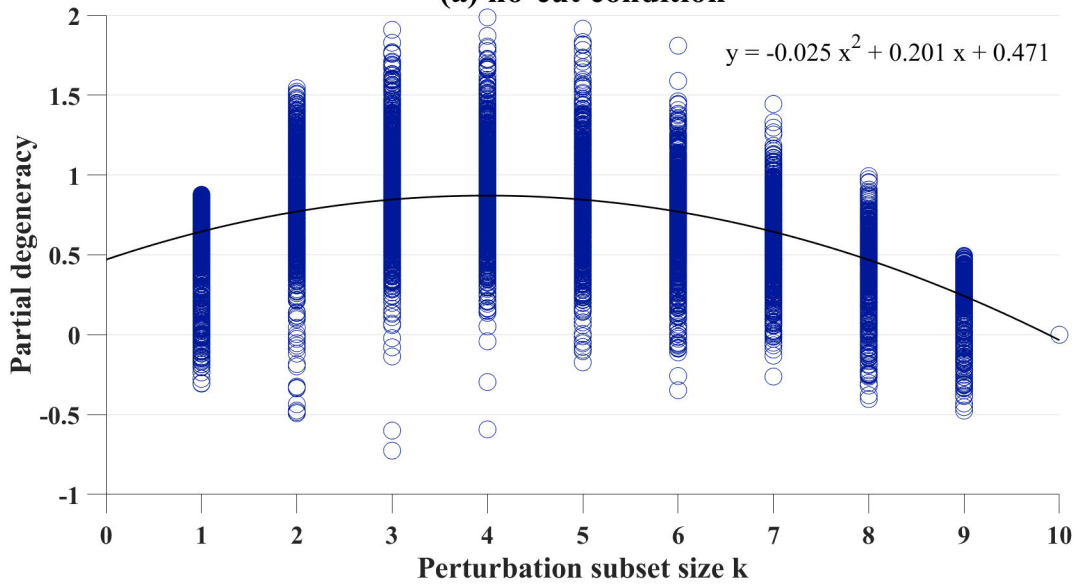



**(b) 100%-cut condition**

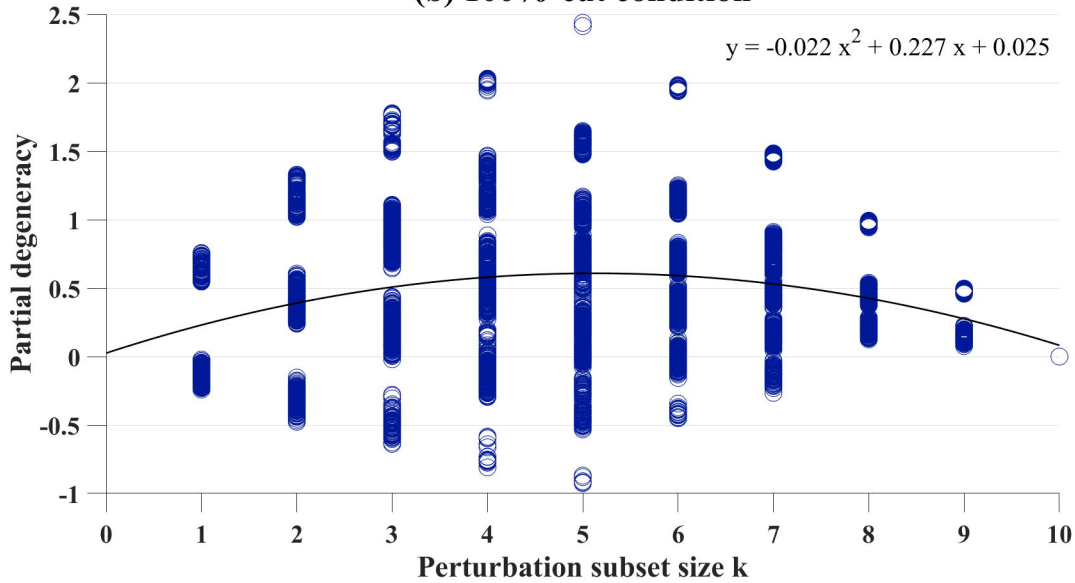





**(a)**

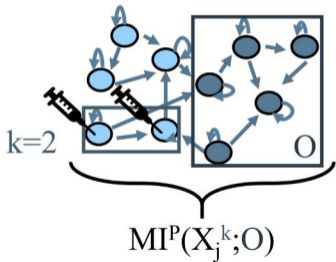

**(b)**

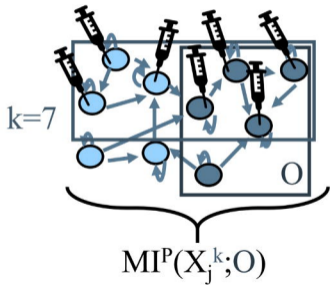

$$X = (A \vee B) \wedge \neg(C)$$

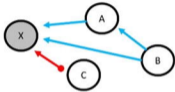

$$\begin{aligned} \frac{d[X]}{dt} &= m \left( \frac{\alpha_0 + \alpha_A[A] + \alpha_B[B] + \alpha_C[C] + \alpha_{AB}[A][B] + \alpha_{AC}[A][C] + \alpha_{BC}[B][C] + \alpha_{ABC}[A][B][C]}{1 + [A] + [B] + [C] + [A][B] + [A][C] + [B][C] + [A][B][C]} \right) - l_x[X] \\ &= m \left( \frac{[A] + [B] + [A][B]}{1 + [A] + [B] + [C] + [A][B] + [A][C] + [B][C] + [A][B][C]} \right) - l_x[X], \end{aligned}$$
